# Supplementary material for: Distance sampling surveys reveal 17 million vertebrates directly killed by the 2020’s wildfires in the Pantanal, Brazil
Source: PubMed Central journal article supplement (PMC8677733; doi:10.1038/s41598-021-02844-5), 2021-12-16
Supplement: 41598_2021_2844_MOESM1_ESM.pdf [file 41598_2021_2844_MOESM1_ESM.pdf]

## Supplementary information

S1. Identified vertebrate species detected along transect lines, directly killed by the 2020's wildfire in the Brazilian portion of Pantanal wetland. Groups refer to small (S) and medium to large (L) bodied vertebrates.

| Group | Sub-group    | Identified species                |
|-------|--------------|-----------------------------------|
| S     | Amphibians   | <i>Leptodactylus luctator</i>     |
|       |              | <i>Leptodactylus macrosternum</i> |
|       |              | <i>Pseudis platensis</i>          |
|       |              | <i>Rhinella diptycha</i>          |
|       |              | <i>Scinax acuminatus</i>          |
|       | Small snakes | <i>Chironius dixoni</i>           |
|       |              | <i>Chironius laurenti</i>         |
|       |              | <i>Helicops boitata</i>           |
|       |              | <i>Helicops leopardinus</i>       |
|       |              | <i>Hydrops caesurus</i>           |
|       |              | <i>Liophis militaris</i>          |
|       |              | <i>Palusophis bifossatus</i>      |

*Pseudoeryx plicatilis*

*Amerotyphlops* sp.

Small lizards

*Copeoglossum nigropunctatum*

*Manciola guaporicola*

*Ophiodes* sp.

Small birds

*Chionomesa fimbriata*

*Columbina talpacoti*

*Crotophaga ani*

*Cyanocorax chrysops*

*Leptotila rufaxilla*

*Leptotila verreauxi*

*Picumnus albosquamatus*

*Procacicus solitarius*

*Ramphastos toco*

*Sporophila collaris*

Tinamidae

Small marsupials

*Cryptonanus chacoensis*

*Philander canus*

Small rodents

*Holochilus chacarius*

*Sylvilagus brasiliensis*

---

L

Large lizards

*Dracaena paraguayensis*

*Iguana iguana*

Anacondas

*Eunectes notaeus*

Chelonians

*Chelonoidis carbonarius*

Caiman

*Caiman yacare*

Medium to large birds

*Aramides cajaneus*

*Aramus guarauna*

Ciconiidae

*Crax fasciolata*

*Crypturellus undulatus*

*Ortalis canicollis*

*Penelope ochrogaster*

Armadillos

*Dasypus novemcinctus*

*Euphractus sexcinctus*

Anteaters

*Tamandua tetradactyla*

Primates

*Alouatta caraya*

*Plecturocebus cf. pallescens*

|                         |                                  |
|-------------------------|----------------------------------|
|                         | <i>Sapajus cay</i>               |
| Medium to large rodents | <i>Coendou prehensilis</i>       |
|                         | <i>Dasyprocta azarae</i>         |
|                         | <i>Hydrochoerus hydrochaeris</i> |
| Ungulates               | <i>Mazama americana</i>          |
|                         | <i>Tayassu pecari</i>            |

---
